# Supplementary material for: A single atom change “switches-on” the solar-to-energy conversion efficiency of Zn-porphyrin based dye sensitized solar cells to 10.5%
Source: Royal Society of Chemistry journal article supplement (doi:10.1039/c4ee03320e), 2015-01-01
Supplement: c4ee03320e1.pdf [file c4ee03320e1.pdf]

## Supplementary Information

### A single atom change “switches-on” solar-to-energy conversion efficiency on Zn-porphyrin based Dye Sensitized Solar Cell to 10.5%.

Figure 1S. Molecular dipole for the dyes described at the manuscript.

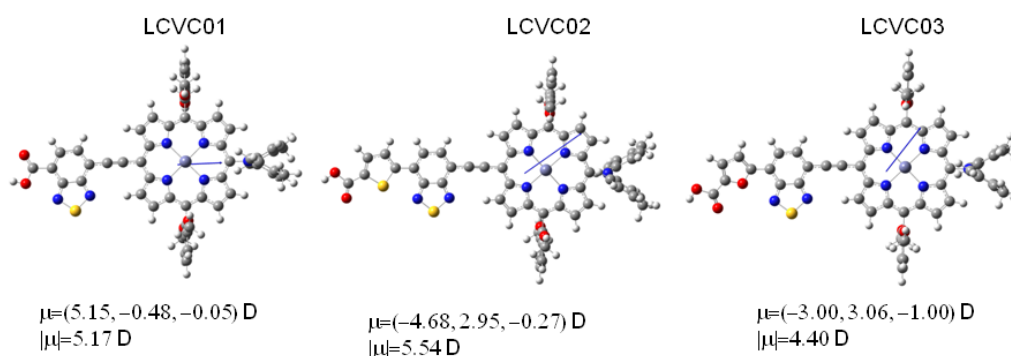

We also have include the Excel files that show the integration of our IPCE against the 1.5.AM G solar spectrum using the Excel procedure developed by NREL (National Renewable Energy Labs, USA) which can be found free on charge in the internet.

Files For IPCE Integration are Excel files:

IPCE (LCV01).xlsx

IPCE ( LCV02).xlsx

IPCE ( LCV03).xlsx

Below you can find pictures extracted from the Excel files:

**This spreadsheet computes the photocurrent resulting from the overlap integral between an arbitrary IPCE spectrum and the AM1.5G Global spectrum (ASTM G173-03).**

Beta 0.99 + Mod by Werther  
(Linear interpolation of QE values between points)

LCV01

**Paste quantum efficiency data below:  
(Wavelength between 300 nm and 1240 nm, with any arbitrary spacing)**

| Wavelength (nm) | QE (%)      |
|-----------------|-------------|
| 300             | 12,66422758 |
| 310             | 3,548653858 |
| 320             | 2,834135601 |
| 330             | 2,469770637 |
| 340             | 3,166170348 |
| 350             | 9,516599292 |
| 360             | 12,72964291 |
| 370             | 9,824270218 |
| 380             | 7,627211294 |
| 390             | 8,724174215 |
| 400             | 13,7866617  |
| 410             | 23,1216311  |
| 420             | 35,40407381 |
| 430             | 46,44582613 |
| 440             | 54,65537294 |
| 450             | 59,55835027 |
| 460             | 58,49672162 |
| 470             | 52,05313805 |
| 480             | 44,36593419 |
| 490             | 39,3037028  |
| 500             | 35,3527906  |
| 510             | 32,82746582 |
| 520             | 30,1875154  |
| 530             | 28,22701729 |
| 540             | 26,27721639 |
| 550             | 24,64359455 |
| 560             | 22,31827599 |
| 570             | 20,47222188 |
| 580             | 18,69597199 |
| 590             | 16,3504839  |
| 600             | 14,2349475  |
| 620             | 15,34228383 |
| 630             | 18,16897473 |
| 640             | 21,75979956 |
| 650             | 26,51379741 |
| 660             | 33,26999596 |
| 670             | 40,47819686 |
| 680             | 46,86614225 |
| 690             | 48,52408804 |

$$J_{sc} = 7,56 \text{ mA/cm}^2$$

This spreadsheet computes the photocurrent resulting from the overlap integral between an arbitrary IPCE spectrum and the AM1.5G Global spectrum (ASTM G173-03).

Beta 0.99 + Mod by Werther  
(Linear interpolation of QE values between points)

LCVC02

Paste quantum efficiency data below:  
(Wavelength between 300 nm and 1240 nm, with any arbitrary spacing)

| Wavelength (nm) | QE (%)  |
|-----------------|---------|
| 300             | 199,459 |
| 310             | 88,7552 |
| 320             | 57,4205 |
| 330             | 43,0059 |
| 340             | 34,6742 |
| 350             | 31,0784 |
| 360             | 31,3467 |
| 370             | 32,8018 |
| 380             | 37,2435 |
| 390             | 43,1206 |
| 400             | 51,649  |
| 410             | 59,2844 |
| 420             | 65,2849 |
| 430             | 68,5602 |
| 440             | 70,0421 |
| 450             | 72,7856 |
| 460             | 74,2348 |
| 470             | 75,3968 |
| 480             | 76,5915 |
| 490             | 76,2071 |
| 500             | 76,7964 |
| 510             | 76,1012 |
| 520             | 75,7302 |
| 530             | 75,3748 |
| 540             | 74,7295 |
| 550             | 74,7081 |
| 560             | 75,0966 |
| 570             | 74,7925 |
| 580             | 73,2895 |
| 590             | 72,3829 |
| 600             | 69,9985 |
| 610             | 71,207  |
| 620             | 74,0012 |
| 630             | 77,6205 |
| 640             | 81,9596 |
| 650             | 84,3411 |
| 660             | 87,5018 |
| 670             | 89,2137 |
| 680             | 89,1686 |

$$J_{sc} = 19,18 \text{ mA/cm}^2$$

This spreadsheet computes the photocurrent resulting from the overlap integral between an arbitrary IPCE spectrum and the AM1.5G Global spectrum (ASTM G173-03).

Beta 0.99 + Mod by Werther  
(Linear interpolation of QE values between points)

LCVC03

Paste quantum efficiency data below:  
(Wavelength between 300 nm and 1240 nm, with any arbitrary spacing)

| Wavelength (nm) | QE (%)      |
|-----------------|-------------|
| 300             | 5,955730536 |
| 310             | 3,199135027 |
| 320             | 2,943798984 |
| 330             | 2,702546259 |
| 340             | 2,903031963 |
| 350             | 6,960533469 |
| 360             | 11,04557216 |
| 370             | 12,52721363 |
| 380             | 13,91648445 |
| 390             | 16,1570108  |
| 400             | 20,1406925  |
| 410             | 25,88361898 |
| 420             | 31,97587041 |
| 430             | 35,63859391 |
| 440             | 36,86328547 |
| 450             | 37,71869312 |
| 460             | 37,12852022 |
| 470             | 36,80366366 |
| 480             | 35,41446401 |
| 490             | 32,89947828 |
| 500             | 30,51844388 |
| 510             | 27,27825214 |
| 520             | 24,91905704 |
| 530             | 22,47108088 |
| 540             | 20,4303     |
| 550             | 18,63394821 |
| 560             | 16,97922127 |
| 570             | 15,1801138  |
| 580             | 13,55138487 |
| 590             | 12,12845409 |
| 600             | 11,02952371 |
| 610             | 11,13460997 |
| 620             | 12,87079904 |
| 630             | 15,55507805 |
| 640             | 19,10017675 |
| 650             | 23,4628037  |
| 660             | 28,82380969 |
| 670             | 33,95685766 |
| 680             | 35,22041574 |

$J_{sc} = 5,61 \text{ mA/cm}^2$
